# Supplementary material for: Lipid Droplet Biosynthesis Impairment through DGAT2 Inhibition Sensitizes MCF7 Breast Cancer Cells to Radiation
Source: MDPI journal article supplement (doi:10.3390/ijms221810102), 2021-09-18
Supplement: s1 [file s1]

**A**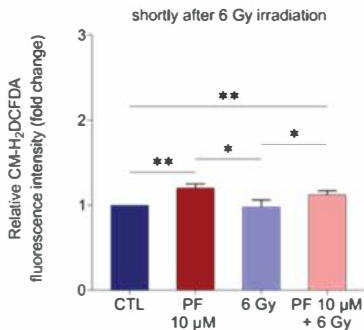**B**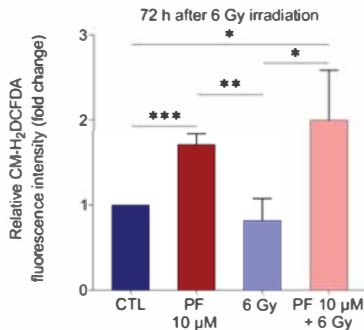

**Supplemental Figure S1.** Effects of 10  $\mu$ M PF-06424439 treatment on ROS generation in MCF7 cells shortly after 6 Gy X-rays (A) and 72 h post irradiation (B), as assessed by CM-H<sub>2</sub>DCFDA assay. The results are presented as fold changes compared to control (CTL) of 3 independent experiments  $\pm$  SD (\* $p \leq 0.05$ , \*\* $p \leq 0.01$ , \*\*\* $p \leq 0.001$ ).
